# Supplementary material for: Flexible Label-Free Platinum and Bio-PET-Based Immunosensor for the Detection of SARS-CoV-2
Source: MDPI journal article supplement (doi:10.3390/bios13020190), 2023-01-26
Supplement: s1 [file s1]

## **Supporting information:**

### **Flexible label-free platinum and Bio-PET-based immunosensor for the detection of SARS-CoV-2**

*Rodrigo Vieira Blasques<sup>1,2</sup>, Paulo Roberto de Oliveira<sup>1,3</sup>, Cristiane Kalinke<sup>3,4</sup>, Laís  
Canniatti Brazaca<sup>5</sup>, Robert D. Crapnell<sup>3</sup>, Juliano Alves Bonacin<sup>4</sup>, Craig E. Banks<sup>3</sup>,  
Bruno Campos Janegitz<sup>1\*</sup>*

*<sup>1</sup>Laboratory of Sensors, Nanomedicine and Nanostructured Materials, Federal  
University of São Carlos, Araras, 13600-970, Brazil.*

*<sup>2</sup>Department of Physics, Chemistry, and Mathematics, Federal University of São Carlos,  
Sorocaba, São Paulo, Brazil, 18052-780*

*<sup>3</sup> Faculty of Science and Engineering, Manchester Metropolitan University, Chester  
Street, Manchester, M1 5GD, United Kingdom.*

*<sup>4</sup> Institute of Chemistry, University of Campinas, 13083-970, Campinas, SP, Brazil*

*<sup>5</sup> Department of Chemistry and Chemical Biology, Harvard University, Cambridge,  
Massachusetts, 02138, United States.*

\* Corresponding authors: [brunocj@ufscar.br](mailto:brunocj@ufscar.br) (Bruno Campos Janegitz);

[paulo.oliveira@ufscar.br](mailto:paulo.oliveira@ufscar.br) (Paulo Roberto de Oliveira).

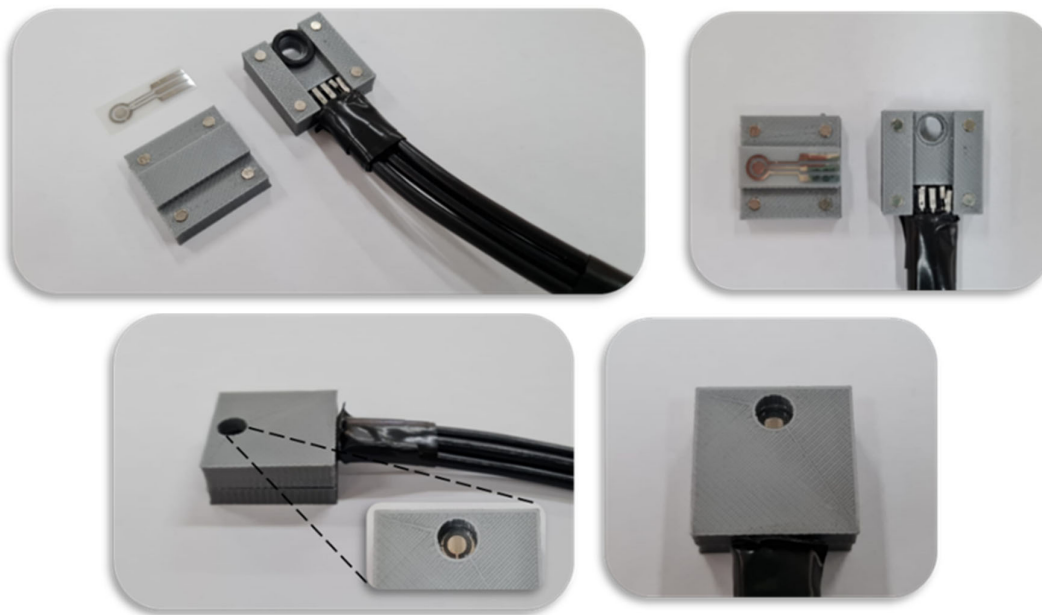

**Figure S1.** Assembly of the proposed device in 3D printing for clinical analysis.

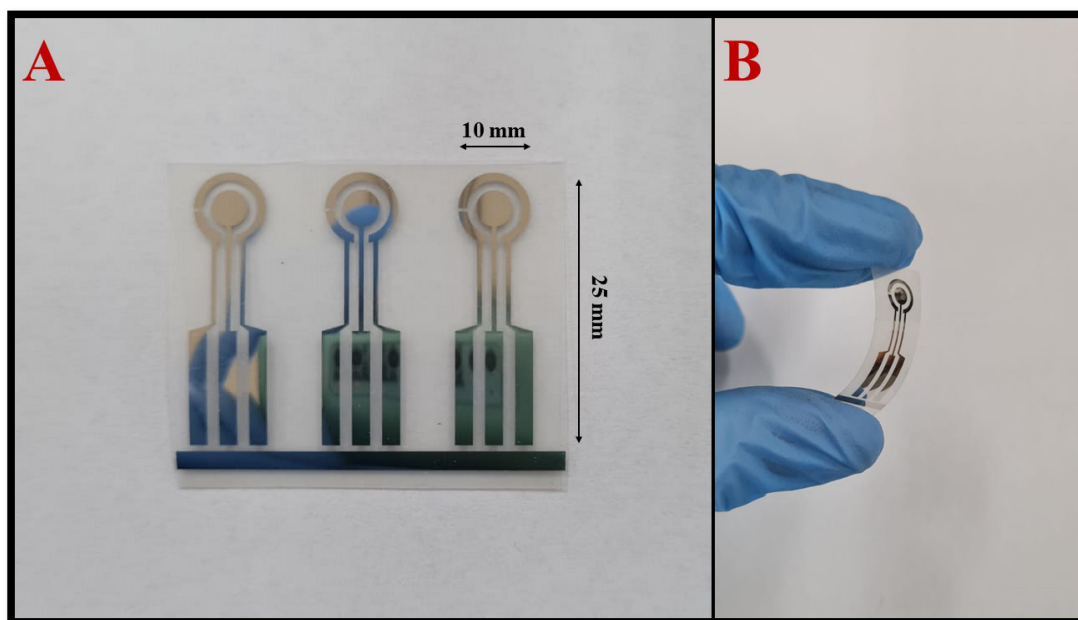

**Figure S2.** (A) Flexible platinum electrodes fabricated by photolithography on Bio-PET substrate (geometric area of  $0.03 \pm 0.1 \text{ cm}^2$ ); (B) Mechanical stress process applied to an electrode.

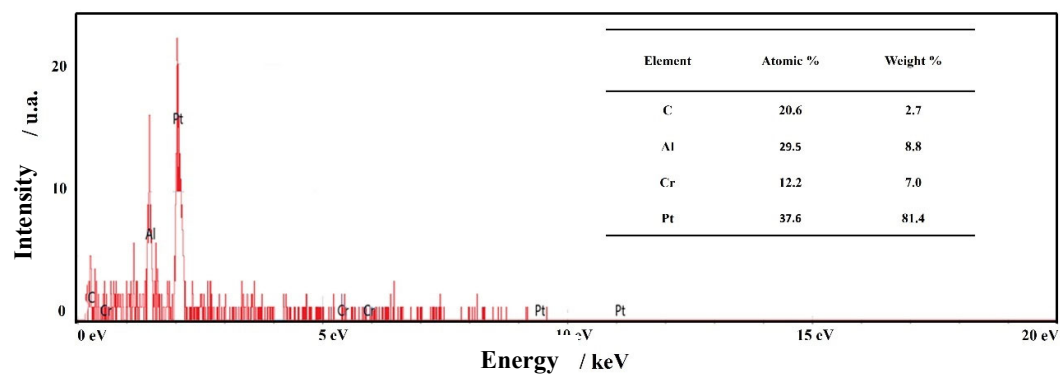

**Figure S3.** EDS spectra for the semi-quantitative distribution of chemical elements on the platinum electrode surface.

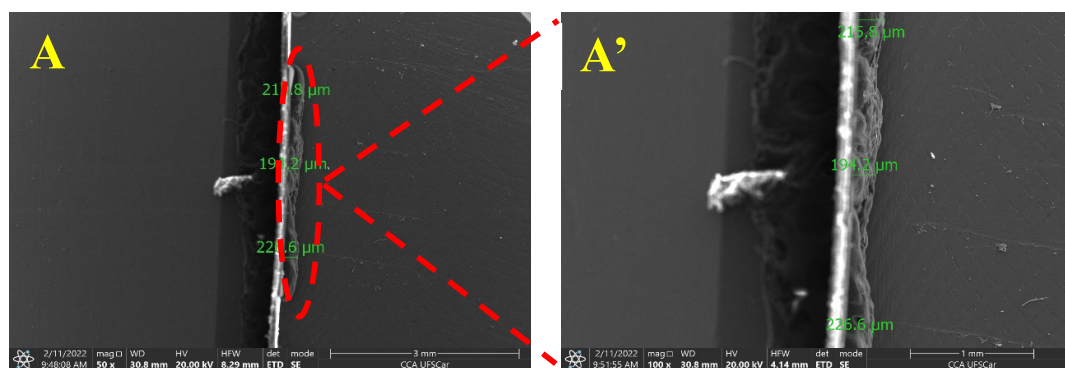

**Figure S4.** SEM images of Pt film thickness.

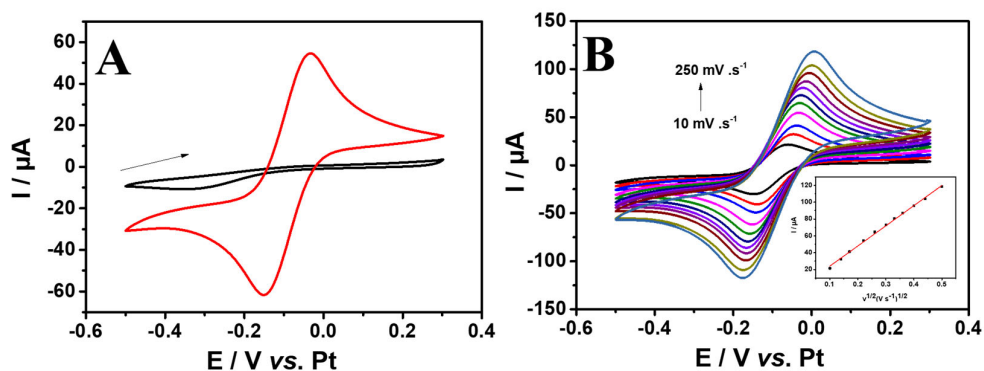

**Figure S5.** (A) Cyclic voltammograms of the flexible platinum electrode in the presence (—) and absence (—) of an equimolar mixture of  $5.0 \text{ mmol L}^{-1} [\text{Fe}(\text{CN})_6]^{3-/4-}$ ; (B) Cyclic voltammograms obtained varying the scan rate at 10, 20, 30, 50, 70, 90, 110, 130, 160, 200 and  $250 \text{ mV s}^{-1}$ ; Inset: plot of current response in function of  $v^{1/2}$ .

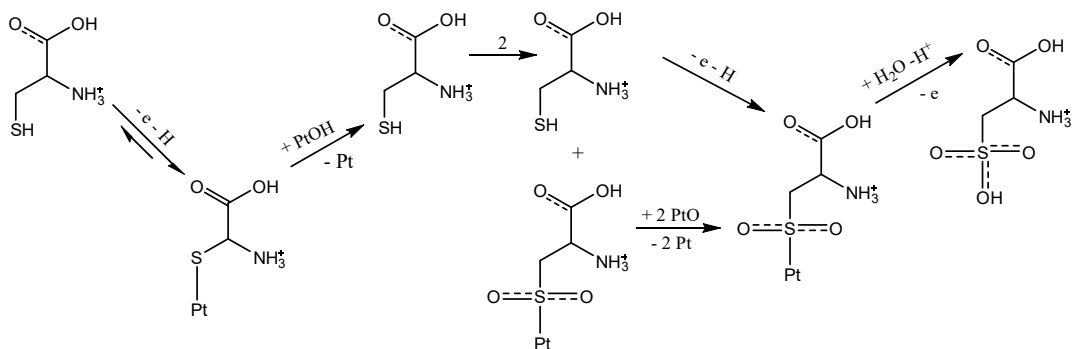

**Figure S6.** Proposed mechanism of the oxidation of L-Cys on the surface of the Pt electrode [1].

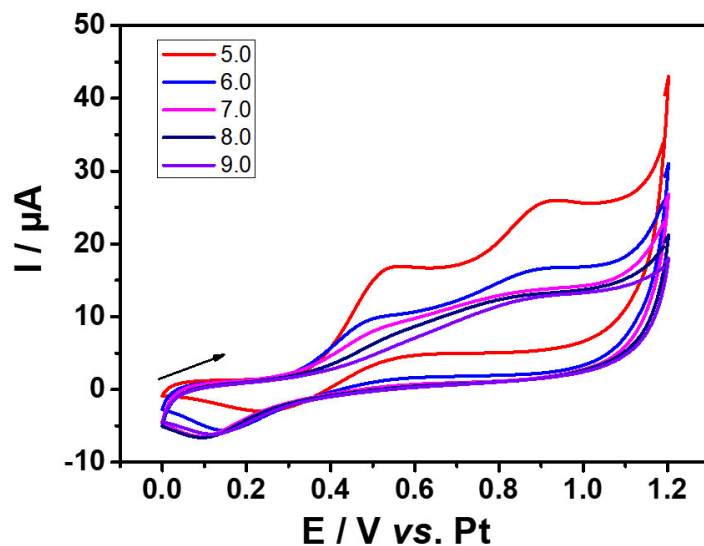

**Figure S7.** Effect of pH for the cyclic voltammetric behavior of the Pt electrode in presence of  $500 \mu\text{mol L}^{-1}$  L-Cys.

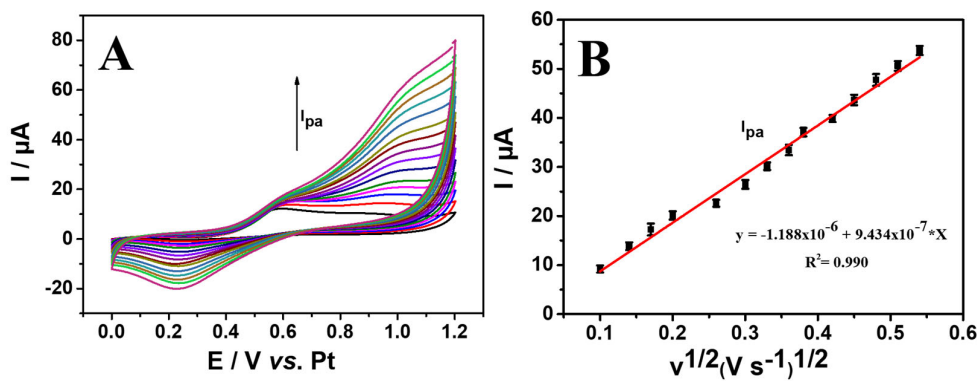

**Figure S8.** (A) Cyclic voltammograms obtained with the Pt electrode in  $0.1 \text{ mol L}^{-1}$  PBS (pH 6.0) containing  $1000 \mu\text{mol L}^{-1}$  L-cysteine at different scan rates, from  $0.01$  to  $0.30 \text{ V s}^{-1}$ . (B) Linear plot of L-cysteine  $I_{\text{pa}}$  versus  $v^{1/2} (\text{V s}^{-1})^{1/2}$ .

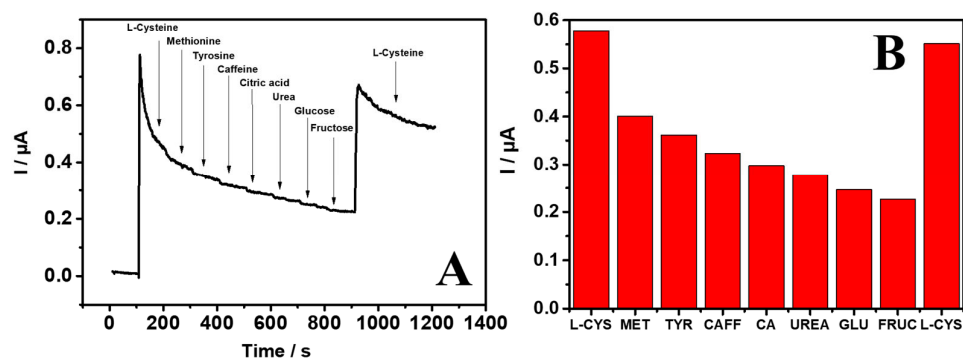

**Figure S9.** (A) Chronoamperogram and (B) current response obtained for successive additions of L-Cys and different interfering species (Methionine, Tyrosine, Caffeine, Citric acid, Urea, Glucose, and Fructose) at an applied potential of 0.55 V. Supporting electrolyte: 0.1 mol L<sup>-1</sup> PBS pH 6.0.

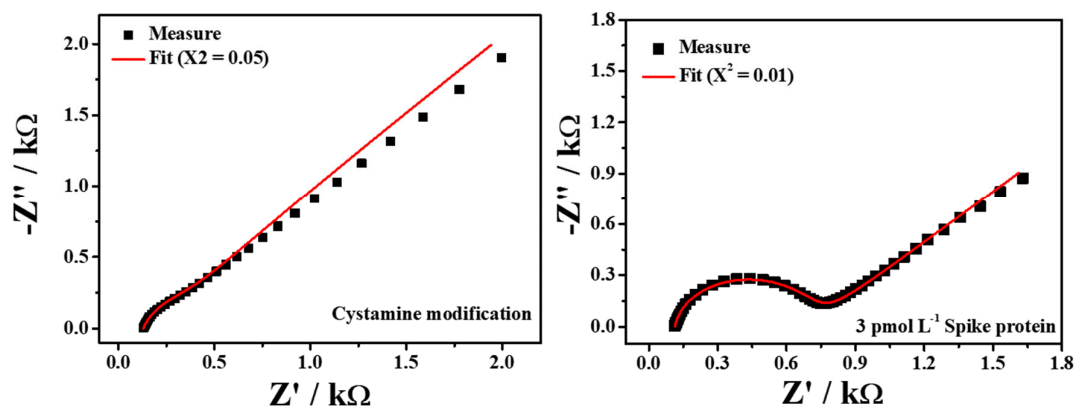

**Figure S10.** Fit simulation of the equivalent circuit for the first and last immunosensor modification step.

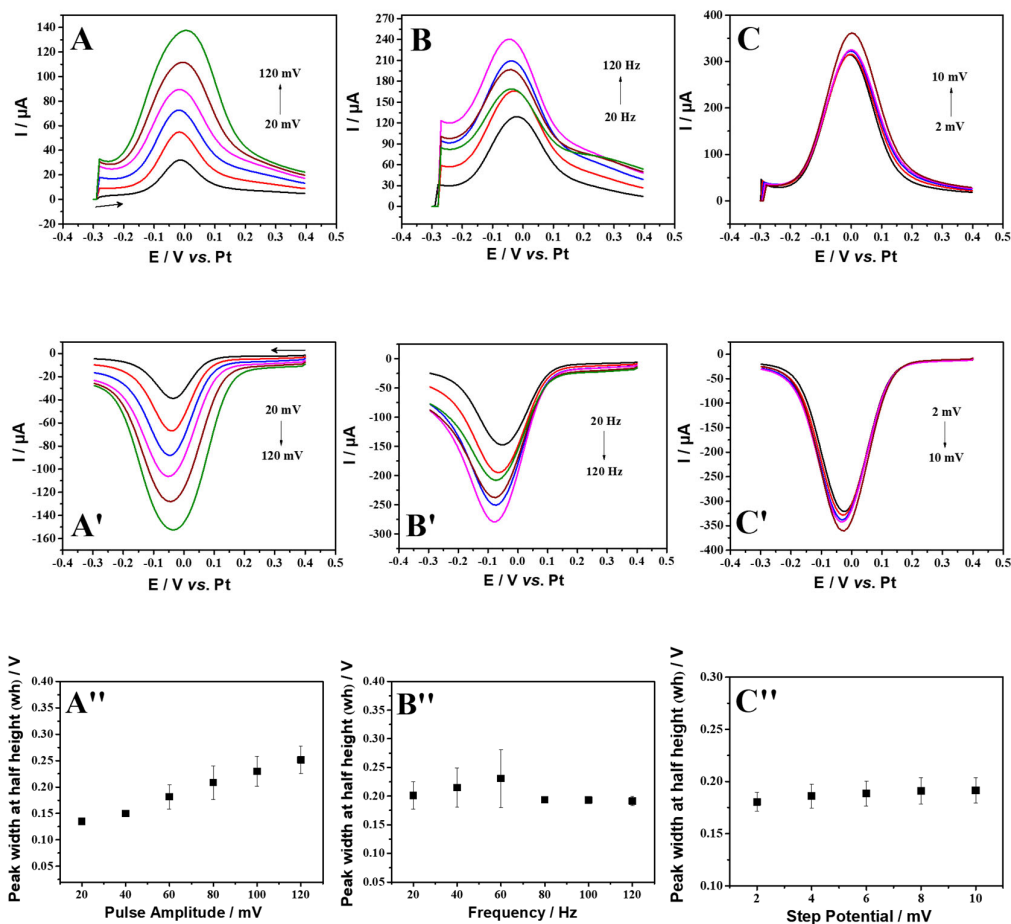

**Figure S11.** Square wave voltammetry direct (A-C) and reverse (A'-C') effect of experimental conditions as function of peak width at half height (A''-C'') for 0.1  $\mu\text{mol L}^{-1}$  Spike protein in PBS 1x in the presence equimolar mixture of 5.0  $\text{mmol L}^{-1}$   $[\text{Fe}(\text{CN})_6]^{3-/4-}$ ; pulse amplitude from 20 to 120 mV (A''), frequency from 20 to 120 Hz (B'') and step potential from 2 to 10 mV (C'').

**Table S1** - Analytical performance of the Pt-based sensor for the L-Cys determination compared with other sensors in the literature.

| Electrode                                         | Technique                | Linear range<br>( $\mu\text{mol L}^{-1}$ ) | LOD<br>( $\mu\text{mol L}^{-1}$ ) | Ref.                 |
|---------------------------------------------------|--------------------------|--------------------------------------------|-----------------------------------|----------------------|
| AuNP/MnP/FTO                                      | Chronoamperometry        | 12.0 to 34.0                               | 2.40                              | [2]                  |
| SPE/PB-ammine                                     | Chronoamperometry        | 100 to 500                                 | 72.0                              | [3]                  |
| GR/CD/Pt/SPE                                      | DPV                      | 0.50 to 40.0<br>40.0 to 170                | 0.12                              | [4]                  |
| Poli (ácido <i>p</i> -<br>cumárico) /<br>MWNT/GCE | DPV                      | 7.5 to 1000                                | 1.1                               | [5]                  |
| CuFe <sub>2</sub> O <sub>4</sub> /rGO-<br>Au      | CV                       | 50.0 to 400                                | 0.383                             | [6]                  |
| 3D PLA-G <sub>DMF</sub> -<br>EC+PB                | Chronoamperometry        | 3.0 to 230                                 | 0.858                             | [7]                  |
| FePc-<br>AuNP/GPE                                 | DPV                      | 50.0 to 1000                               | 0.27                              | [8]                  |
| GC/RGO/cobalt<br>(II) porphyrazine                | Chronoamperometry        | 1000 to 6.6×10 <sup>5</sup>                | 0.79                              | [9]                  |
| MoN/N-<br>MWNTs                                   | Chronoamperometry        | 5.0 to 1.26×10 <sup>4</sup>                | 3.64                              | [10]                 |
| Cu-CoHCF                                          | CV                       | 6.0 to 1000                                | 5.0                               | [11]                 |
| InHCF                                             | Chronoamperometry        | 100 to 1000                                | 50                                | [12]                 |
| CoTAPc-<br>MWNTs                                  | Chronoamperometry        | 5.0 to 40                                  | 0.28                              | [13]                 |
| <i>Pt/Bio-PET</i>                                 | <i>Chronoamperometry</i> | <i>3.98 to 39.0</i><br><i>39.0 to 145</i>  | <i>0.70</i><br><i>2.36</i>        | <i>This<br/>work</i> |

**Notes:** AuNP: gold nanoparticles; MnP: metallated porphyrin; FTO: fluorine tin oxide-coated glass; SPE: screen-printed electrodes; PLA-G<sub>DMF</sub>-EC: activated polylactic acid and graphene electrode; PB: Prussian blue; GR: reduced graphene; CD: oxide- $\beta$ -cyclodextrin; Pt: platinum; MWNT: multi-walled carbon nanotubes; GCE: glassy carbon electrode; CuFe<sub>2</sub>O<sub>4</sub>: copper ferrite;



rGO: reduced graphene oxide; MoN/N-MWNTs: Molybdenum nitride/nitrogen-doped multi-walled carbon nanotubes; Cu-CoHCF: copper–cobalt hexacyanoferrate; InHCF: Indium hexacyanoferrate; CoTAPc: cobalt tetraaminophthalocyanine

## References

- [1] A.H.B. Dourado, M. Arenz, S.I. Córdoba de Torresi, Mechanism of Electrochemical L-Cysteine Oxidation on Pt, 6(2019) 1009-13.
- [2] M.C. Gallo, B.M. Pires, K.C.F. Toledo, S.A.V. Jannuzzi, E.G.R. Arruda, A.L.B. Formiga, et al., The use of modified electrodes by hybrid systems gold nanoparticles/Mn-porphyrin in electrochemical detection of cysteine, *Synthetic Metals*, 198(2014) 335-9.
- [3] J.A. Bonacin, P.L. Dos Santos, V. Katic, C.W. Foster, C.E. Banks, Use of Screen-printed Electrodes Modified by Prussian Blue and Analogues in Sensing of Cysteine, *Electroanalysis*, 30(2018) 170-9.
- [4] M. Singh, N. Jaiswal, I. Tiwari, C.W. Foster, C.E. Banks, A reduced graphene oxide-cyclodextrin-platinum nanocomposite modified screen printed electrode for the detection of cysteine, *Journal of Electroanalytical Chemistry*, 829(2018) 230-40.
- [5] G. Ziyatdinova, E. Kozlova, H. Budnikov, Selective electrochemical sensor based on the electropolymerized p-coumaric acid for the direct determination of l-cysteine, *Electrochimica Acta*, 270(2018) 369-77.
- [6] K. Atacan, CuFe<sub>2</sub>O<sub>4</sub>/reduced graphene oxide nanocomposite decorated with gold nanoparticles as a new electrochemical sensor material for L-cysteine detection, *Journal of Alloys and Compounds*, 791(2019) 391-401.
- [7] C. Kalinke, P.R. de Oliveira, B.C. Janegitz, J.A. Bonacin, Prussian blue nanoparticles anchored on activated 3D printed sensor for the detection of L-cysteine, *Sensors and Actuators B: Chemical*, 362(2022) 131797.
- [8] M.N. Abbas, A.A. Saeed, B. Singh, A.A. Radwan, E. Dempsey, A cysteine sensor based on a gold nanoparticle–iron phthalocyanine modified graphite paste electrode, *Analytical Methods*, 7(2015) 2529-36.
- [9] M. Falkowski, T. Rebis, M. Kryjewski, L. Popenda, S. Lijewski, S. Jurga, et al., An enhanced electrochemical nanohybrid sensing platform consisting of reduced graphene oxide and sulfanyl metalloporphyrines for sensitive determination of hydrogen peroxide and l-cysteine, *Dyes and Pigments*, 138(2017) 190-203.

- [10] D. Geng, M. Li, X. Bo, L. Guo, Molybdenum nitride/nitrogen-doped multi-walled carbon nanotubes hybrid nanocomposites as novel electrochemical sensor for detection l-cysteine, *Sensors and Actuators B: Chemical*, 237(2016) 581-90.
- [11] A. Abbaspour, A. Ghaffarinejad, Electrocatalytic oxidation of l-cysteine with a stable copper–cobalt hexacyanoferrate electrochemically modified carbon paste electrode, *Electrochimica Acta*, 53(2008) 6643-50.
- [12] K.-S. Tseng, L.-C. Chen, K.-C. Ho, Amperometric Detection of Cysteine at an  $\text{In}^{3+}$  Stabilized Indium Hexacyanoferrate Modified Electrode, 18(2006) 1306-12.
- [13] S. Nyoni, T. Mugadza, T. Nyokong, Improved l-cysteine electrocatalysis through a sequential drop dry technique using multi-walled carbon nanotubes and cobalt tetraaminophthalocyanine conjugates, *Electrochimica Acta*, 128(2014) 32-40.
